# Supplementary material for: Clinical Characterization of Respiratory Syncytial Virus Infection in Adults: A Neglected Disease?
Source: MDPI journal article supplement (doi:10.3390/v15091848), 2023-08-31
Supplement: s1 [file s1]

## Supplementary Tables

Table S1. General characteristics of each group in the respiratory surveillance cohort, by infectious agent.

|                      | FluA       |                    |           |         |                     | FluB       |                    |           |         |                     | RSV        |                    |           |         |                     |
|----------------------|------------|--------------------|-----------|---------|---------------------|------------|--------------------|-----------|---------|---------------------|------------|--------------------|-----------|---------|---------------------|
|                      | N response | N positive or mean | % or s.d. | p-value | X <sup>2</sup> ; df | N response | N positive or mean | % or s.d. | p-value | X <sup>2</sup> ; df | N response | N positive or mean | % or s.d. | p-value | X <sup>2</sup> ; df |
| <b>Age group</b>     |            |                    |           |         |                     |            |                    |           |         |                     |            |                    |           |         |                     |
| Adult                | 36         | 30                 | 83.33%    | <0.001  | 16; 1               | 9          | 7                  | 77.78%    | 0.096   | 2.778; 1            | 51         | 23                 | 45.10%    | 0.484   | 0.490; 1            |
| Elderly              | 36         | 6                  | 16.67%    |         |                     | 9          | 2                  | 22.22%    |         |                     | 51         | 28                 | 54.90%    |         |                     |
| Mean age             | 36         | 38.56              | 19.51     | NA      | NA                  | 9          | 42.89              | 18.19     | NA      | NA                  | 51         | 59.20              | 18.21     | NA      | NA                  |
| <b>Sex</b>           |            |                    |           |         |                     |            |                    |           |         |                     |            |                    |           |         |                     |
| Female               | 36         | 14                 | 38.89%    | 0.182   | 1.778; 1            | 9          | 7                  | 77.78%    | 0.096   | 2.778; 1            | 51         | 26                 | 50.98%    | 0.889   | 0.020; 1            |
| Male                 | 36         | 22                 | 61.11%    |         |                     | 9          | 2                  | 22.22%    |         |                     | 51         | 25                 | 49.02%    |         |                     |
| <b>Ethnicity</b>     |            |                    |           |         |                     |            |                    |           |         |                     |            |                    |           |         |                     |
| White                | 33         | 29                 | 87.88%    | <0.001  | 44.364; 2           | 8          | 8                  | 100.00%   | NA      | NA                  | 51         | 46                 | 90.20%    | <0.001  | 74.235; 2           |
| Black                | 33         | 3                  | 9.09%     |         |                     | 8          | 0                  | 0.00%     |         |                     | 51         | 3                  | 5.88%     |         |                     |
| Mixed race           | 33         | 1                  | 3.03%     |         |                     | 8          | 0                  | 0.00%     |         |                     | 51         | 2                  | 3.92%     |         |                     |
| <b>Education</b>     |            |                    |           |         |                     |            |                    |           |         |                     |            |                    |           |         |                     |
| Primary incomplete   | 31         | 6                  | 19.35%    | 0.250   | 2.774; 2            | 7          | 1                  | 14.29%    | 0.565   | 1.143; 2            | 46         | 26                 | 56.52%    | 0.004   | 11.261; 2           |
| Primary              | 31         | 0                  | 0.00%     |         |                     | 7          | 0                  | 0.00%     |         |                     | 46         | 0                  | 0.00%     |         |                     |
| High school          | 31         | 12                 | 38.71%    |         |                     | 7          | 3                  | 42.86%    |         |                     | 46         | 9                  | 19.57%    |         |                     |
| College              | 31         | 13                 | 41.94%    |         |                     | 7          | 3                  | 42.86%    |         |                     | 46         | 11                 | 23.91%    |         |                     |
| <b>Comorbidities</b> |            |                    |           |         |                     |            |                    |           |         |                     |            |                    |           |         |                     |
|                      | 33         | 13                 | 39.39%    | 0.223   | 1.485; 1            | 5          | 2                  | 40.00%    | 0.655   | 0.200; 1            | 46         | 39                 | 84.78%    | <0.001  | 22.261; 1           |

Table S2. Clinical characteristics of patients infected by influenza A and B and respiratory syncytial virus in the respiratory surveillance cohort, December 2021–April 2022.

|                       | Influenza A |                    |           | Influenza B |                    |           | RSV        |                    |           | p-value      |
|-----------------------|-------------|--------------------|-----------|-------------|--------------------|-----------|------------|--------------------|-----------|--------------|
|                       | N response  | N positive or mean | % or s.d. | N response  | N positive or mean | % or s.d. | N response | N positive or mean | % or s.d. |              |
| <b>Sex</b>            |             |                    |           |             |                    |           |            |                    |           |              |
| Female                | 30          | 11                 | 36.67%    | 7           | 6                  | 85.71%    | 23         | 11                 | 47.83%    | 0.064        |
| Male                  | 30          | 19                 | 63.33%    | 7           | 1                  | 14.29%    | 23         | 12                 | 52.17%    |              |
| <b>Ethnicity</b>      |             |                    |           |             |                    |           |            |                    |           |              |
| White                 | 27          | 23                 | 85.19%    | 7           | 7                  | 100.00%   | 23         | 19                 | 82.61%    | 0.739        |
| Black                 | 27          | 3                  | 11.11%    | 7           | 0                  | 0.00%     | 23         | 2                  | 8.70%     |              |
| Mixed race            | 27          | 1                  | 3.70%     | 7           | 0                  | 0.00%     | 23         | 2                  | 8.70%     |              |
| <b>Education</b>      |             |                    |           |             |                    |           |            |                    |           |              |
| Primary incomplete    | 25          | 3                  | 12.00%    | 5           | 0                  | 0.00%     | 20         | 8                  | 40.00%    | 0.127        |
| Primary               | 25          | 0                  | 0.00%     | 5           | 0                  | 0.00%     | 20         | 0                  | 0.00%     |              |
| High school           | 25          | 11                 | 44.00%    | 5           | 2                  | 40.00%    | 20         | 7                  | 35.00%    |              |
| College               | 25          | 11                 | 44.00%    | 5           | 3                  | 60.00%    | 20         | 5                  | 25.00%    |              |
| <b>Comorbidities</b>  |             |                    |           |             |                    |           |            |                    |           |              |
| Cardiopathy           | 28          | 8                  | 28.57%    | 5           | 2                  | 40.00%    | 20         | 13                 | 65.00%    | <b>0.042</b> |
| Blood pressure        | 28          | 0                  | 0.00%     | 5           | 0                  | 0.00%     | 20         | 3                  | 15.00%    | 0.073        |
| Hematological disease | 28          | 3                  | 10.71%    | 5           | 2                  | 40.00%    | 20         | 5                  | 25.00%    | 0.205        |
| Down syndrome         | 28          | 0                  | 0.00%     | 5           | 0                  | 0.00%     | 20         | 1                  | 5.00%     | 0.431        |
| Liver disease         | 28          | 0                  | 0.00%     | 5           | 0                  | 0.00%     | 20         | 2                  | 10.00%    | 0.180        |
| Asthma                | 28          | 0                  | 0.00%     | 5           | 0                  | 0.00%     | 20         | 4                  | 20.00%    | <b>0.028</b> |
| Diabetes              | 28          | 0                  | 0.00%     | 5           | 0                  | 0.00%     | 20         | 0                  | 0.00%     | NA           |
|                       | 28          | 1                  | 3.57%     | 5           | 0                  | 0.00%     | 20         | 5                  | 25.00%    | 0.049        |

|                       |    |   |        |   |   |        |    |   |        |       |
|-----------------------|----|---|--------|---|---|--------|----|---|--------|-------|
| Neurovascular disease | 28 | 0 | 0.00%  | 5 | 0 | 0.00%  | 20 | 1 | 5.00%  | 0.431 |
| Neurological disease  | 28 | 0 | 0.00%  | 5 | 0 | 0.00%  | 20 | 0 | 0.00%  | NA    |
| Pneumopathy           | 28 | 0 | 0.00%  | 5 | 0 | 0.00%  | 20 | 2 | 10.00% | 0.180 |
| Immunosuppression     | 28 | 0 | 0.00%  | 5 | 0 | 0.00%  | 20 | 1 | 5.00%  | 0.431 |
| Kidney disease        | 28 | 0 | 0.00%  | 5 | 0 | 0.00%  | 20 | 3 | 15.00% | 0.073 |
| Obesity               | 28 | 1 | 3.57%  | 5 | 0 | 0.00%  | 20 | 1 | 5.00%  | 0.868 |
| Smoker                | 25 | 4 | 16.00% | 3 | 0 | 0.00%  | 17 | 3 | 17.65% | 0.736 |
| Cancer                | 28 | 2 | 7.14%  | 5 | 1 | 20.00% | 20 | 1 | 5.00%  | 0.521 |

### Signs and symptoms

|                      |    |    |        |   |   |        |    |    |        |                  |
|----------------------|----|----|--------|---|---|--------|----|----|--------|------------------|
| Fever                | 28 | 19 | 67.86% | 4 | 1 | 25.00% | 19 | 5  | 26.32% | <b>0.012</b>     |
| Headache             | 28 | 16 | 57.14% | 4 | 1 | 25.00% | 19 | 3  | 15.79% | <b>0.014</b>     |
| Myalgia              | 28 | 18 | 64.29% | 4 | 0 | 0.00%  | 19 | 3  | 15.79% | <b>&lt;0.001</b> |
| Nasal congestion     | 28 | 16 | 57.14% | 4 | 3 | 75.00% | 19 | 5  | 26.32% | 0.058            |
| Cough                | 28 | 22 | 78.57% | 4 | 2 | 50.00% | 19 | 17 | 89.47% | 0.183            |
| Sore throat          | 28 | 11 | 39.29% | 4 | 2 | 50.00% | 19 | 3  | 15.79% | 0.165            |
| Dyspnea              | 28 | 2  | 7.14%  | 4 | 0 | 0.00%  | 19 | 8  | 42.11% | <b>0.007</b>     |
| Respiratory distress | 28 | 0  | 0.00%  | 4 | 0 | 0.00%  | 19 | 6  | 31.58% | <b>0.003</b>     |
| Diarrhea             | 28 | 1  | 3.57%  | 4 | 0 | 0.00%  | 19 | 4  | 21.05% | 0.112            |
| Vomiting             | 28 | 0  | 0.00%  | 4 | 0 | 0.00%  | 19 | 0  | 0.00%  | NA               |
| Abdominal pain       | 28 | 2  | 7.14%  | 4 | 1 | 25.00% | 19 | 1  | 5.26%  | 0.402            |
| Malaise              | 28 | 6  | 21.43% | 4 | 0 | 0.00%  | 19 | 4  | 21.05% | 0.589            |
| Loss of smell        | 28 | 1  | 3.57%  | 4 | 0 | 0.00%  | 19 | 0  | 0.00%  | 0.658            |
| Loss of taste        | 28 | 1  | 3.57%  | 4 | 0 | 0.00%  | 19 | 0  | 0.00%  | 0.658            |

|                            |    |    |         |   |   |         |    |    |         |              |
|----------------------------|----|----|---------|---|---|---------|----|----|---------|--------------|
| <b>Hospitalization</b>     | 30 | 30 | 100.00% | 7 | 7 | 100.00% | 23 | 23 | 100.00% | NA           |
| <b>ICU</b>                 | 29 | 0  | 0.00%   | 7 | 1 | 14.29%  | 23 | 3  | 13.04%  | 0.125        |
| <b>Ventilatory support</b> | 29 | 1  | 3.45%   | 7 | 1 | 14.29%  | 23 | 8  | 34.78%  | <b>0.011</b> |
| <b>Death</b>               | 29 | 3  | 10.34%  | 7 | 3 | 42.86%  | 20 | 8  | 40.00%  | <b>0.032</b> |
